# Supplementary material for: Vitamin D both facilitates and attenuates the cellular response to lipopolysaccharide
Source: PubMed Central journal article supplement (PMC5366921; doi:10.1038/srep45172), 2017-03-27
Supplement: srep45172-s1.pdf [file srep45172-s1.pdf]

## Supplementary material

### **Vitamin D both facilitates and attenuates the cellular response to lipopolysaccharide**

Ling Chen<sup>1</sup>, Mathew Eapen<sup>1</sup>, Graeme R. Zosky<sup>1</sup>

<sup>1</sup>School of Medicine, Faculty of Health, University of Tasmania, Hobart, Tasmania, Australia, 7000

#### **Results**

##### *LL-37 production by BEAS-2B cells and macrophages*

24 hours after exposure to LPS, the production of LL-37 was not detectable by ELISA in the supernatants from BEAS-2B cells (*data not shown*). There was of effect of LPS treatment ( $p = 0.06$ ) or  $1,25(\text{OH})_2\text{D}_3$  ( $p = 0.09$ ) on the secretion of LL-37 from macrophages (Figure S1).

#### **Methods**

##### *Cathelicidin (LL-37) production by BEAS-2B cells and monocytes*

The supernatants from BEAS-2B cells and macrophages were collected for the assessment of levels of cathelicidin using the human LL-37 ELISA kit (Hycult Biotech, Plymouth Meeting, PA), according to the manufacturer's instruction.

#### **Figures and figure legends**

Figure S1

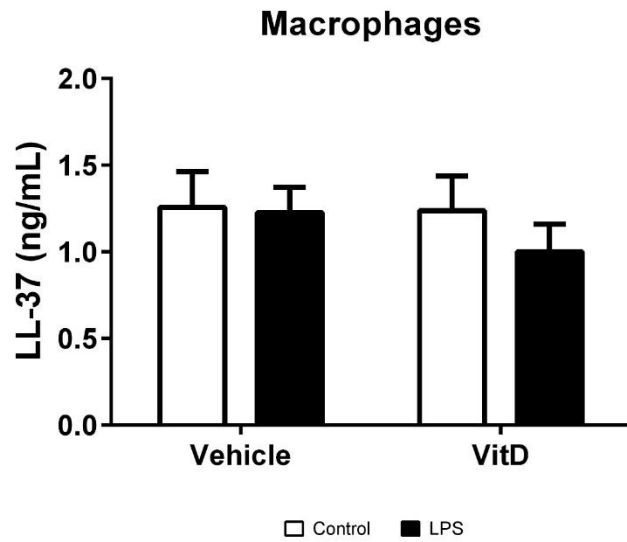

Figure S1: Production of LL-37 in the supernatant of macrophages with (black bars) and without (white bars) LPS in the presence of vehicle or vitamin D (1,25(OH)<sub>2</sub>D<sub>3</sub>). Data are represented as mean (SD), n = 7/group.
